# Supplementary material for: Solving Natural Conic Formulations with Hypatia.jl
Source: Atypon-hosted journal article supplement (doi:10.1287/ijoc.2022.1202), 2022-06-03

# Results supplement for: Solving natural conic formulations with Hypatia.jl

Chris Coey<sup>1</sup>, Lea Kapelevich<sup>1</sup>, and Juan Pablo Vielma<sup>2</sup>

<sup>1</sup>Operations Research Center, MIT, Cambridge, MA

<sup>2</sup>Google Research and MIT Sloan School of Management, Cambridge, MA

This file contains the results generated for “Solving natural conic formulations with Hypatia.jl”.

Table 1: Portfolio rebalancing solver statistics.

| $k$   | Hypatia-NF |    |      | Hypatia-EF |    |      | MOSEK-EF  |    |      |
|-------|------------|----|------|------------|----|------|-----------|----|------|
|       | st         | it | time | st         | it | time | st        | it | time |
| 1000  | <u>co</u>  | 31 | 0.6  | <u>co</u>  | 25 | 2.7  | <u>co</u> | 9  | 1.7  |
| 2000  | <u>co</u>  | 36 | 2.9  | <u>co</u>  | 28 | 16   | <u>co</u> | 10 | 7.0  |
| 4000  | <u>co</u>  | 45 | 20   | <u>co</u>  | 29 | 92   | <u>co</u> | 10 | 34   |
| 6000  | <u>co</u>  | 49 | 60   | <u>co</u>  | 34 | 292  | <u>co</u> | 10 | 83   |
| 8000  | <u>co</u>  | 51 | 131  | <u>co</u>  | 33 | 615  | <u>co</u> | 10 | 160  |
| 10000 | <u>co</u>  | 55 | 244  | <u>co</u>  | 36 | 1192 | <u>co</u> | 12 | 305  |
| 12000 | <u>co</u>  | 62 | 421  | <u>tl</u>  | 32 | 1805 | <u>co</u> | 10 | 433  |
| 14000 | <u>co</u>  | 61 | 624  | sk         | *  | *    | rl        | *  | *    |
| 16000 | <u>co</u>  | 63 | 924  | sk         | *  | *    | sk        | *  | *    |
| 18000 | <u>co</u>  | 64 | 1327 | sk         | *  | *    | sk        | *  | *    |
| 20000 | <u>co</u>  | 66 | 1810 | sk         | *  | *    | sk        | *  | *    |

Table 2: Portfolio rebalancing EF LP solver time comparisons.

| $k$   | ECOS  | MOSEK |        | Gurobi  |         |           |           |
|-------|-------|-------|--------|---------|---------|-----------|-----------|
|       | conic | conic | intpnt | simplex | barrier | P simplex | D simplex |
| 1000  | 192   | 1.7   | 2.3    | 39      | 2.8     | 68        | 57        |
| 4000  | *     | 34    | 66     | *       | 55      | *         | *         |
| 10000 | *     | 305   | 783    | *       | 548     | *         | *         |
| 20000 | *     | *     | *      | *       | *       | *         | *         |

Table 3: Matrix completion formulation statistics. Note  $p = \bar{p} = |S|$ .

| $m$ | $k$ | NF    |       |       |       | EF-exp      |           |           | EF-sec      |           |           |
|-----|-----|-------|-------|-------|-------|-------------|-----------|-----------|-------------|-----------|-----------|
|     |     | $\nu$ | $n$   | $p$   | $q$   | $\bar{\nu}$ | $\bar{n}$ | $\bar{q}$ | $\bar{\nu}$ | $\bar{n}$ | $\bar{q}$ |
| 10  | 5   | 57    | 251   | 200   | 302   | 207         | 302       | 1692      | 182         | 314       | 1730      |
|     | 10  | 218   | 1001  | 794   | 1208  | 730         | 1208      | 6725      | 621         | 1256      | 6871      |
|     | 15  | 472   | 2251  | 1795  | 2707  | 1532        | 2707      | 15062     | 1188        | 2762      | 15229     |
|     | 20  | 846   | 4001  | 3176  | 4826  | 2694        | 4826      | 26784     | 2267        | 5024      | 27380     |
|     | 25  | 1299  | 6251  | 4978  | 7524  | 4093        | 7524      | 41768     | 4370        | 8298      | 44092     |
|     | 30  | 1858  | 9001  | 7174  | 10828 | 5810        | 10828     | 60095     | 4425        | 11048     | 60757     |
|     | 35  | 2477  | 12251 | 9810  | 14692 | 7707        | 14692     | 81627     | 8576        | 16346     | 86591     |
|     | 40  | 3256  | 16001 | 12786 | 19216 | 10084       | 19216     | 106664    | 8631        | 20096     | 109306    |
|     | 45  | 4142  | 20251 | 16155 | 24347 | 12782       | 24347     | 135047    | 8686        | 24346     | 135046    |
| 20  | 5   | 114   | 501   | 393   | 609   | 428         | 609       | 5888      | 360         | 628       | 5947      |
|     | 10  | 418   | 2001  | 1594  | 2408  | 1430        | 2408      | 23375     | 1233        | 2512      | 23689     |
|     | 15  | 933   | 4501  | 3584  | 5418  | 3065        | 5418      | 52520     | 2362        | 5524      | 52840     |
|     | 20  | 1663  | 8001  | 6359  | 9643  | 5345        | 9643      | 93335     | 4515        | 10048     | 94552     |
|     | 25  | 2513  | 12501 | 10014 | 14988 | 7985        | 14988     | 145535    | 8716        | 16596     | 150361    |
|     | 30  | 3643  | 18001 | 14389 | 21613 | 11465       | 21613     | 209600    | 8821        | 22096     | 211051    |

Table 4: Matrix completion solver statistics.

| $m$ | $k$ | NF        |    |      | EF-exp    |    |      |           |    |      | EF-sec    |    |      |           |    |      |
|-----|-----|-----------|----|------|-----------|----|------|-----------|----|------|-----------|----|------|-----------|----|------|
|     |     | Hypatia   |    |      | Hypatia   |    |      | MOSEK     |    |      | Hypatia   |    |      | MOSEK     |    |      |
|     |     | st        | it | time |
| 10  | 5   | <u>co</u> | 14 | 0.0  | <u>co</u> | 19 | 0.1  | <u>co</u> | 15 | 0.9  | <u>co</u> | 18 | 0.2  | <u>co</u> | 11 | 0.7  |
|     | 10  | <u>co</u> | 19 | 0.4  | <u>co</u> | 34 | 2.2  | <u>co</u> | 20 | 20   | <u>co</u> | 30 | 2.3  | <u>co</u> | 10 | 11   |
|     | 15  | <u>co</u> | 23 | 2.6  | <u>co</u> | 42 | 16   | <u>co</u> | 21 | 120  | <u>co</u> | 41 | 18   | <u>co</u> | 9  | 58   |
|     | 20  | <u>co</u> | 26 | 14   | <u>co</u> | 52 | 70   | <u>co</u> | 24 | 524  | <u>co</u> | 47 | 78   | <u>co</u> | 11 | 251  |
|     | 25  | <u>co</u> | 30 | 52   | <u>co</u> | 59 | 225  | <u>co</u> | 26 | 1758 | <u>co</u> | 69 | 387  | <u>co</u> | 11 | 770  |
|     | 30  | <u>co</u> | 34 | 166  | <u>co</u> | 61 | 556  | tl        | 11 | 1817 | <u>co</u> | 55 | 587  | <u>co</u> | 10 | 1712 |
|     | 35  | <u>co</u> | 39 | 402  | <u>co</u> | 61 | 1228 | sk        | *  | *    | tl        | 61 | 1817 | rl        | *  | *    |
|     | 40  | <u>co</u> | 48 | 949  | tl        | 34 | 1820 | sk        | *  | *    | sk        | *  | *    | sk        | *  | *    |
|     | 45  | <u>co</u> | 47 | 1806 | sk        | *  | *    |
| 20  | 5   | <u>co</u> | 15 | 0.1  | <u>co</u> | 29 | 0.8  | <u>co</u> | 17 | 14   | <u>co</u> | 26 | 0.9  | <u>co</u> | 8  | 7.6  |
|     | 10  | <u>co</u> | 22 | 2.2  | <u>co</u> | 48 | 25   | <u>co</u> | 25 | 448  | <u>co</u> | 45 | 27   | <u>co</u> | 10 | 203  |
|     | 15  | <u>co</u> | 30 | 24   | <u>co</u> | 59 | 179  | tl        | 14 | 1871 | <u>co</u> | 52 | 176  | <u>co</u> | 10 | 1375 |
|     | 20  | <u>co</u> | 33 | 119  | <u>co</u> | 71 | 786  | sk        | *  | *    | <u>co</u> | 70 | 924  | rl        | *  | *    |
|     | 25  | <u>co</u> | 41 | 448  | tl        | 47 | 1822 | sk        | *  | *    | tl        | 26 | 1804 | sk        | *  | *    |
|     | 30  | <u>co</u> | 52 | 1305 | sk        | *  | *    |

Table 5: Multi-response regression formulation and solver statistics.

| $m$ | $k$  | form. stats. |       | Hypatia-NF |    |      | Hypatia-EF |    |      | MOSEK-EF  |    |      |
|-----|------|--------------|-------|------------|----|------|------------|----|------|-----------|----|------|
|     |      | $\bar{n}$    | $q$   | st         | it | time | st         | it | time | st        | it | time |
| 15  | 50   | 1622         | 977   | <u>co</u>  | 11 | 0.1  | <u>co</u>  | 12 | 1.1  | <u>co</u> | 4  | 0.6  |
|     | 100  | 5397         | 1727  | <u>co</u>  | 10 | 0.5  | <u>co</u>  | 12 | 17   | <u>co</u> | 5  | 6.7  |
|     | 150  | 11672        | 2477  | <u>co</u>  | 10 | 1.2  | <u>co</u>  | 13 | 98   | <u>co</u> | 5  | 36   |
|     | 250  | 31722        | 3977  | <u>co</u>  | 10 | 3.3  | <u>co</u>  | 14 | 1331 | <u>co</u> | 5  | 308  |
|     | 500  | 125597       | 7727  | <u>co</u>  | 10 | 17   | m          | *  | *    | tl        | *  | *    |
|     | 1000 | *            | 15227 | <u>co</u>  | 13 | 129  | sk         | *  | *    | sk        | *  | *    |
|     | 1500 | *            | 22727 | <u>co</u>  | 10 | 209  | sk         | *  | *    | sk        | *  | *    |
|     | 2000 | *            | 30227 | <u>co</u>  | 9  | 395  | sk         | *  | *    | sk        | *  | *    |
|     | 2500 | *            | 37727 | <u>co</u>  | 11 | 949  | sk         | *  | *    | sk        | *  | *    |
|     | 3000 | *            | 45227 | <u>co</u>  | 11 | 1375 | sk         | *  | *    | sk        | *  | *    |
| 30  | 50   | 2642         | 2402  | <u>co</u>  | 13 | 1.4  | <u>co</u>  | 11 | 3.7  | <u>co</u> | 5  | 1.6  |
|     | 100  | 6417         | 3902  | <u>co</u>  | 14 | 4.9  | <u>co</u>  | 11 | 23   | <u>co</u> | 5  | 12   |
|     | 150  | 12692        | 5402  | <u>co</u>  | 12 | 7.0  | <u>co</u>  | 12 | 123  | <u>co</u> | 5  | 47   |
|     | 250  | 32742        | 8402  | <u>co</u>  | 15 | 41   | <u>co</u>  | 13 | 1412 | <u>co</u> | 5  | 409  |
|     | 500  | 126617       | 15902 | <u>co</u>  | 11 | 107  | m          | *  | *    | tl        | *  | *    |
|     | 750  | *            | 23402 | <u>co</u>  | 11 | 232  | sk         | *  | *    | sk        | *  | *    |
|     | 1000 | *            | 30902 | <u>co</u>  | 13 | 768  | sk         | *  | *    | sk        | *  | *    |
|     | 1250 | *            | 38402 | <u>co</u>  | 12 | 1098 | sk         | *  | *    | sk        | *  | *    |
|     | 1500 | *            | 45902 | <u>co</u>  | 12 | 1637 | sk         | *  | *    | sk        | *  | *    |

Table 6: D-optimal experiment design logdet variant formulation and solver statistics.

| $k$  | form. stats. |        |           | Hypatia-NF |    |      | Hypatia-EF |    |      | MOSEK-EF  |    |      |
|------|--------------|--------|-----------|------------|----|------|------------|----|------|-----------|----|------|
|      | $\bar{n}$    | $q$    | $\bar{q}$ | st         | it | time | st         | it | time | st        | it | time |
| 50   | 1426         | 1378   | 5401      | <u>co</u>  | 25 | 0.3  | <u>co</u>  | 21 | 4.5  | <u>co</u> | 15 | 12   |
| 100  | 5351         | 5253   | 20801     | <u>co</u>  | 26 | 0.9  | <u>co</u>  | 25 | 91   | <u>co</u> | 15 | 277  |
| 150  | 11776        | 11628  | 46201     | <u>co</u>  | 29 | 3.0  | <u>co</u>  | 27 | 690  | <u>tl</u> | 14 | 1825 |
| 200  | 20701        | 20503  | 81601     | <u>co</u>  | 28 | 7.2  | tl         | 17 | 1849 | sk        | *  | *    |
| 300  | 46051        | 45753  | 182401    | <u>co</u>  | 36 | 36   | sk         | *  | *    | sk        | *  | *    |
| 400  | 81401        | 81003  | 323201    | <u>co</u>  | 36 | 81   | m          | *  | *    | sk        | *  | *    |
| 500  | 126751       | 126253 | 504001    | <u>co</u>  | 36 | 169  | sk         | *  | *    | sk        | *  | *    |
| 600  | 182101       | 181503 | 724801    | <u>co</u>  | 36 | 298  | sk         | *  | *    | sk        | *  | *    |
| 700  | *            | 246753 | *         | <u>co</u>  | 39 | 624  | sk         | *  | *    | m         | *  | *    |
| 800  | *            | 322003 | *         | <u>co</u>  | 37 | 838  | sk         | *  | *    | sk        | *  | *    |
| 900  | *            | 407253 | *         | <u>co</u>  | 37 | 1282 | sk         | *  | *    | sk        | *  | *    |
| 1000 | *            | 502503 | *         | <u>tl</u>  | 37 | 1838 | sk         | *  | *    | sk        | *  | *    |

Table 7: D-optimal experiment design rt-det variant solver statistics.

| $k$  | NF        |    |      | EF-exp    |    |      |           |    |      | EF-sec    |    |      |           |    |      |
|------|-----------|----|------|-----------|----|------|-----------|----|------|-----------|----|------|-----------|----|------|
|      | Hypatia   |    |      | Hypatia   |    |      | MOSEK     |    |      | Hypatia   |    |      | MOSEK     |    |      |
|      | st        | it | time |
| 50   | <u>co</u> | 25 | 0.3  | <u>co</u> | 22 | 4.7  | <u>co</u> | 14 | 11   | <u>co</u> | 22 | 5.1  | <u>co</u> | 11 | 10   |
| 100  | <u>co</u> | 25 | 0.9  | <u>co</u> | 25 | 93   | <u>co</u> | 13 | 247  | <u>co</u> | 26 | 97   | <u>co</u> | 11 | 220  |
| 150  | <u>co</u> | 26 | 2.6  | <u>co</u> | 27 | 696  | <u>co</u> | 12 | 1580 | <u>sp</u> | 36 | 921  | <u>co</u> | 10 | 1432 |
| 200  | <u>co</u> | 23 | 5.8  | tl        | 17 | 1821 | tl        | 0  | 1821 | tl        | 17 | 1848 | tl        | 0  | 1868 |
| 300  | <u>co</u> | 31 | 31   | sk        | *  | *    |
| 400  | <u>co</u> | 29 | 67   | m         | *  | *    | sk        | *  | *    | m         | *  | *    | sk        | *  | *    |
| 500  | <u>co</u> | 32 | 152  | sk        | *  | *    |
| 600  | <u>co</u> | 33 | 281  | sk        | *  | *    |
| 700  | <u>co</u> | 32 | 530  | sk        | *  | *    | m         | *  | *    | sk        | *  | *    | sk        | *  | *    |
| 800  | <u>co</u> | 32 | 728  | sk        | *  | *    |
| 900  | <u>co</u> | 36 | 1253 | sk        | *  | *    |
| 1000 | <u>co</u> | 33 | 1729 | sk        | *  | *    |

Table 8: Polynomial minimization formulation and solver statistics.

| $m$ | $k$  | form. stats. |       |           | Hypatia-NF |    |      | Hypatia-EF |    |      | MOSEK-EF  |    |      |
|-----|------|--------------|-------|-----------|------------|----|------|------------|----|------|-----------|----|------|
|     |      | $\nu$        | $n$   | $\bar{q}$ | st         | it | time | st         | it | time | st        | it | time |
| 1   | 100  | 201          | 201   | 10201     | <u>co</u>  | 12 | 0.1  | <u>co</u>  | 34 | 1.2  | <u>co</u> | 15 | 27   |
| 1   | 200  | 401          | 401   | 40401     | <u>co</u>  | 14 | 0.3  | <u>co</u>  | 39 | 13   | <u>co</u> | 11 | 409  |
| 1   | 500  | 1001         | 1001  | 251001    | <u>co</u>  | 18 | 2.4  | <u>co</u>  | 57 | 329  | rl        | *  | *    |
| 1   | 1000 | 2001         | 2001  | *         | <u>co</u>  | 19 | 11   | m          | *  | *    | sk        | *  | *    |
| 1   | 2000 | 4001         | 4001  | *         | <u>co</u>  | 21 | 73   | sk         | *  | *    | sk        | *  | *    |
| 1   | 3000 | 6001         | 6001  | *         | <u>co</u>  | 24 | 235  | sk         | *  | *    | sk        | *  | *    |
| 1   | 4000 | 8001         | 8001  | *         | <u>co</u>  | 24 | 508  | sk         | *  | *    | sk        | *  | *    |
| 1   | 5000 | 10001        | 10001 | *         | <u>co</u>  | 24 | 916  | sk         | *  | *    | sk        | *  | *    |
| 2   | 15   | 376          | 496   | 23836     | <u>co</u>  | 15 | 0.4  | <u>co</u>  | 21 | 5.0  | <u>co</u> | 10 | 87   |
| 2   | 30   | 1426         | 1891  | 339946    | <u>co</u>  | 25 | 10   | <u>co</u>  | 49 | 751  | rl        | *  | *    |
| 2   | 45   | 3151         | 4186  | *         | <u>co</u>  | 22 | 58   | m          | *  | *    | sk        | *  | *    |
| 2   | 60   | 5551         | 7381  | *         | <u>co</u>  | 28 | 300  | sk         | *  | *    | sk        | *  | *    |
| 2   | 75   | 8626         | 11476 | *         | <u>co</u>  | 30 | 1019 | sk         | *  | *    | sk        | *  | *    |
| 3   | 6    | 252          | 455   | 8358      | <u>co</u>  | 17 | 0.3  | <u>co</u>  | 17 | 1.6  | <u>co</u> | 9  | 9.1  |
| 3   | 9    | 715          | 1330  | 65395     | <u>co</u>  | 20 | 3.1  | <u>co</u>  | 24 | 104  | <u>co</u> | 9  | 799  |
| 3   | 12   | 1547         | 2925  | 303030    | <u>co</u>  | 23 | 20   | <u>co</u>  | 33 | 1775 | rl        | *  | *    |
| 3   | 15   | 2856         | 5456  | *         | <u>co</u>  | 26 | 89   | m          | *  | *    | sk        | *  | *    |
| 3   | 18   | 4750         | 9139  | *         | er         | 34 | 1340 | sk         | *  | *    | sk        | *  | *    |
| 4   | 4    | 210          | 495   | 5005      | <u>co</u>  | 18 | 0.4  | <u>co</u>  | 16 | 1.7  | <u>co</u> | 8  | 3.9  |
| 4   | 6    | 714          | 1820  | 54159     | <u>co</u>  | 15 | 4.8  | <u>co</u>  | 18 | 222  | <u>co</u> | 10 | 579  |
| 4   | 8    | 1815         | 4845  | *         | <u>co</u>  | 20 | 63   | m          | *  | *    | m         | *  | *    |
| 4   | 10   | 3861         | 10626 | *         | <u>co</u>  | 22 | 458  | sk         | *  | *    | sk        | *  | *    |
| 8   | 2    | 117          | 495   | 1395      | <u>co</u>  | 26 | 0.5  | <u>co</u>  | 21 | 0.7  | <u>co</u> | 11 | 0.9  |
| 8   | 3    | 525          | 3003  | 21975     | <u>co</u>  | 18 | 15   | <u>co</u>  | 16 | 148  | <u>co</u> | 8  | 125  |
| 8   | 4    | 1815         | 12870 | *         | <u>co</u>  | 27 | 633  | m          | *  | *    | m         | *  | *    |
| 16  | 1    | 33           | 153   | 169       | <u>co</u>  | 13 | 0.1  | <u>co</u>  | 12 | 0.7  | <u>co</u> | 7  | 0.0  |
| 16  | 2    | 425          | 4845  | 14229     | <u>co</u>  | 27 | 86   | <u>co</u>  | 22 | 174  | <u>sp</u> | 10 | 192  |
| 32  | 1    | 65           | 561   | 593       | <u>co</u>  | 15 | 0.7  | <u>co</u>  | 12 | 1.0  | <u>co</u> | 7  | 0.2  |
| 64  | 1    | 129          | 2145  | 2209      | <u>co</u>  | 15 | 14   | <u>co</u>  | 12 | 3.1  | <u>co</u> | 9  | 3.0  |

Table 9: Smooth density estimation formulation and solver statistics.

| $m$ | $2k$ | form. stats. |      |           | Hypatia-NF |     |      | Hypatia-EF |    |      | MOSEK-EF  |    |      |
|-----|------|--------------|------|-----------|------------|-----|------|------------|----|------|-----------|----|------|
|     |      | $\nu$        | $n$  | $\bar{n}$ | st         | it  | time | st         | it | time | st        | it | time |
| 1   | 250  | 753          | 252  | 16628     | <u>co</u>  | 35  | 0.2  | sp         | 43 | 1040 | <u>co</u> | 25 | 112  |
| 1   | 500  | 1003         | 502  | 64003     | <u>co</u>  | 42  | 1.1  | rl         | *  | *    | tl        | 18 | 1814 |
| 1   | 1000 | 1503         | 1002 | *         | <u>co</u>  | 41  | 5.1  | m          | *  | *    | m         | *  | *    |
| 1   | 2000 | 2503         | 2002 | *         | <u>co</u>  | 56  | 23   | sk         | *  | *    | sk        | *  | *    |
| 1   | 4000 | 4503         | 4002 | *         | <u>co</u>  | 82  | 185  | sk         | *  | *    | sk        | *  | *    |
| 1   | 6000 | 6503         | 6002 | *         | <u>co</u>  | 106 | 663  | sk         | *  | *    | sk        | *  | *    |
| 2   | 20   | 678          | 232  | 6023      | <u>co</u>  | 50  | 0.3  | <u>co</u>  | 29 | 73   | <u>co</u> | 19 | 7.4  |
| 2   | 40   | 1153         | 862  | 72468     | <u>co</u>  | 34  | 2.9  | rl         | *  | *    | sp        | 22 | 1522 |
| 2   | 60   | 1928         | 1892 | *         | <u>co</u>  | 36  | 11   | m          | *  | *    | m         | *  | *    |
| 2   | 80   | 3003         | 3322 | *         | <u>co</u>  | 53  | 64   | sk         | *  | *    | sk        | *  | *    |
| 2   | 100  | 4378         | 5152 | *         | <u>co</u>  | 64  | 247  | sk         | *  | *    | sk        | *  | *    |
| 3   | 12   | 754          | 456  | 9314      | <u>co</u>  | 57  | 0.9  | <u>co</u>  | 25 | 293  | sp        | 19 | 20   |
| 3   | 18   | 1217         | 1331 | 67226     | <u>co</u>  | 55  | 6.6  | rl         | *  | *    | sp        | 17 | 1216 |
| 3   | 24   | 2049         | 2926 | *         | <u>co</u>  | 46  | 35   | m          | *  | *    | m         | *  | *    |
| 3   | 30   | 3358         | 5457 | *         | <u>co</u>  | 63  | 348  | sk         | *  | *    | sk        | *  | *    |
| 4   | 8    | 712          | 496  | 6001      | <u>co</u>  | 57  | 1.0  | <u>co</u>  | 25 | 133  | sp        | 22 | 12   |
| 4   | 12   | 1216         | 1821 | 56480     | <u>co</u>  | 72  | 16   | tl         | *  | *    | sp        | 20 | 934  |
| 4   | 16   | 2317         | 4846 | *         | <u>co</u>  | 70  | 192  | m          | *  | *    | m         | *  | *    |
| 8   | 4    | 619          | 496  | 2391      | <u>co</u>  | 96  | 2.1  | <u>co</u>  | 30 | 9.8  | sp        | 17 | 2.1  |
| 8   | 6    | 1027         | 3004 | 25479     | <u>co</u>  | 90  | 62   | tl         | *  | *    | sp        | 17 | 379  |

Table 10: Shape constrained regression formulation and solver statistics.

| $m$ | $2k$ | form. stats. |      |           |       | Hypatia-NF |     |      | Hypatia-EF |    |      | MOSEK-EF  |    |      |
|-----|------|--------------|------|-----------|-------|------------|-----|------|------------|----|------|-----------|----|------|
|     |      | $\nu$        | $n$  | $\bar{n}$ | $q$   | st         | it  | time | st         | it | time | st        | it | time |
| 2   | 10   | 72           | 67   | 952       | 203   | <u>co</u>  | 18  | 0.0  | <u>co</u>  | 24 | 0.6  | <u>sp</u> | 19 | 0.4  |
| 2   | 20   | 292          | 232  | 14527     | 803   | <u>co</u>  | 37  | 0.5  | <u>sp</u>  | 68 | 1348 | <u>sp</u> | 20 | 60   |
| 2   | 30   | 662          | 497  | 73727     | 1803  | <u>co</u>  | 58  | 5.6  | rl         | *  | *    | tl        | 12 | 1845 |
| 2   | 40   | 1182         | 862  | *         | 3203  | <u>co</u>  | 84  | 34   | m          | *  | *    | sk        | *  | *    |
| 2   | 50   | 1852         | 1327 | *         | 5003  | er         | 52  | 161  | sk         | *  | *    | sk        | *  | *    |
| 2   | 60   | 2672         | 1892 | *         | 7203  | <u>er</u>  | 120 | 939  | sk         | *  | *    | sk        | *  | *    |
| 3   | 8    | 152          | 166  | 3391      | 671   | <u>co</u>  | 19  | 0.1  | <u>co</u>  | 27 | 14   | <u>sp</u> | 23 | 4.3  |
| 3   | 12   | 485          | 456  | 31347     | 2173  | <u>co</u>  | 38  | 3.5  | tl         | *  | *    | <u>sp</u> | 15 | 244  |
| 3   | 16   | 1118         | 970  | 161584    | 5051  | <u>co</u>  | 61  | 44   | m          | *  | *    | rl        | *  | *    |
| 3   | 20   | 2147         | 1772 | *         | 9753  | <u>co</u>  | 87  | 325  | sk         | *  | *    | sk        | *  | *    |
| 3   | 24   | 3668         | 2926 | *         | 16727 | <u>co</u>  | 111 | 1605 | sk         | *  | *    | sk        | *  | *    |
| 4   | 6    | 142          | 211  | 2881      | 912   | <u>co</u>  | 17  | 0.4  | <u>co</u>  | 23 | 7.8  | <u>sp</u> | 18 | 3.7  |
| 4   | 8    | 382          | 496  | 17686     | 2597  | <u>co</u>  | 24  | 3.1  | <u>co</u>  | 38 | 1621 | <u>sp</u> | 14 | 94   |
| 4   | 10   | 842          | 1002 | 79822     | 5953  | <u>co</u>  | 38  | 35   | rl         | *  | *    | tl        | 12 | 2068 |
| 4   | 12   | 1626         | 1821 | *         | 11832 | <u>co</u>  | 58  | 283  | m          | *  | *    | sk        | *  | *    |
| 4   | 14   | 2858         | 3061 | *         | 21262 | <u>co</u>  | 72  | 1430 | sk         | *  | *    | sk        | *  | *    |
| 6   | 4    | 80           | 211  | 1240      | 800   | <u>co</u>  | 13  | 0.3  | <u>co</u>  | 15 | 0.7  | <u>co</u> | 9  | 0.6  |
| 6   | 6    | 422          | 925  | 20539     | 5336  | <u>co</u>  | 22  | 15   | <u>co</u>  | 32 | 1630 | <u>sp</u> | 17 | 260  |
| 6   | 8    | 1514         | 3004 | 215440    | 22409 | <u>co</u>  | 29  | 638  | m          | *  | *    | rl        | *  | *    |
| 8   | 4    | 138          | 496  | 3412      | 2117  | <u>co</u>  | 19  | 2.1  | <u>co</u>  | 20 | 8.0  | <u>co</u> | 11 | 4.1  |
| 8   | 6    | 938          | 3004 | 89008     | 20825 | <u>co</u>  | 31  | 515  | rl         | *  | *    | rl        | *  | *    |
| 10  | 4    | 212          | 1002 | 7657      | 4633  | <u>co</u>  | 26  | 13   | <u>co</u>  | 24 | 87   | <u>co</u> | 13 | 25   |
| 12  | 4    | 302          | 1821 | 15003     | 8920  | <u>co</u>  | 29  | 73   | <u>co</u>  | 28 | 504  | <u>co</u> | 11 | 125  |
| 14  | 4    | 408          | 3061 | 26686     | 15662 | <u>co</u>  | 33  | 346  | tl         | 0  | 1884 | <u>sp</u> | 21 | 767  |

Figure 1: Solve times (in seconds) for solve runs satisfying the convergence check in (19).

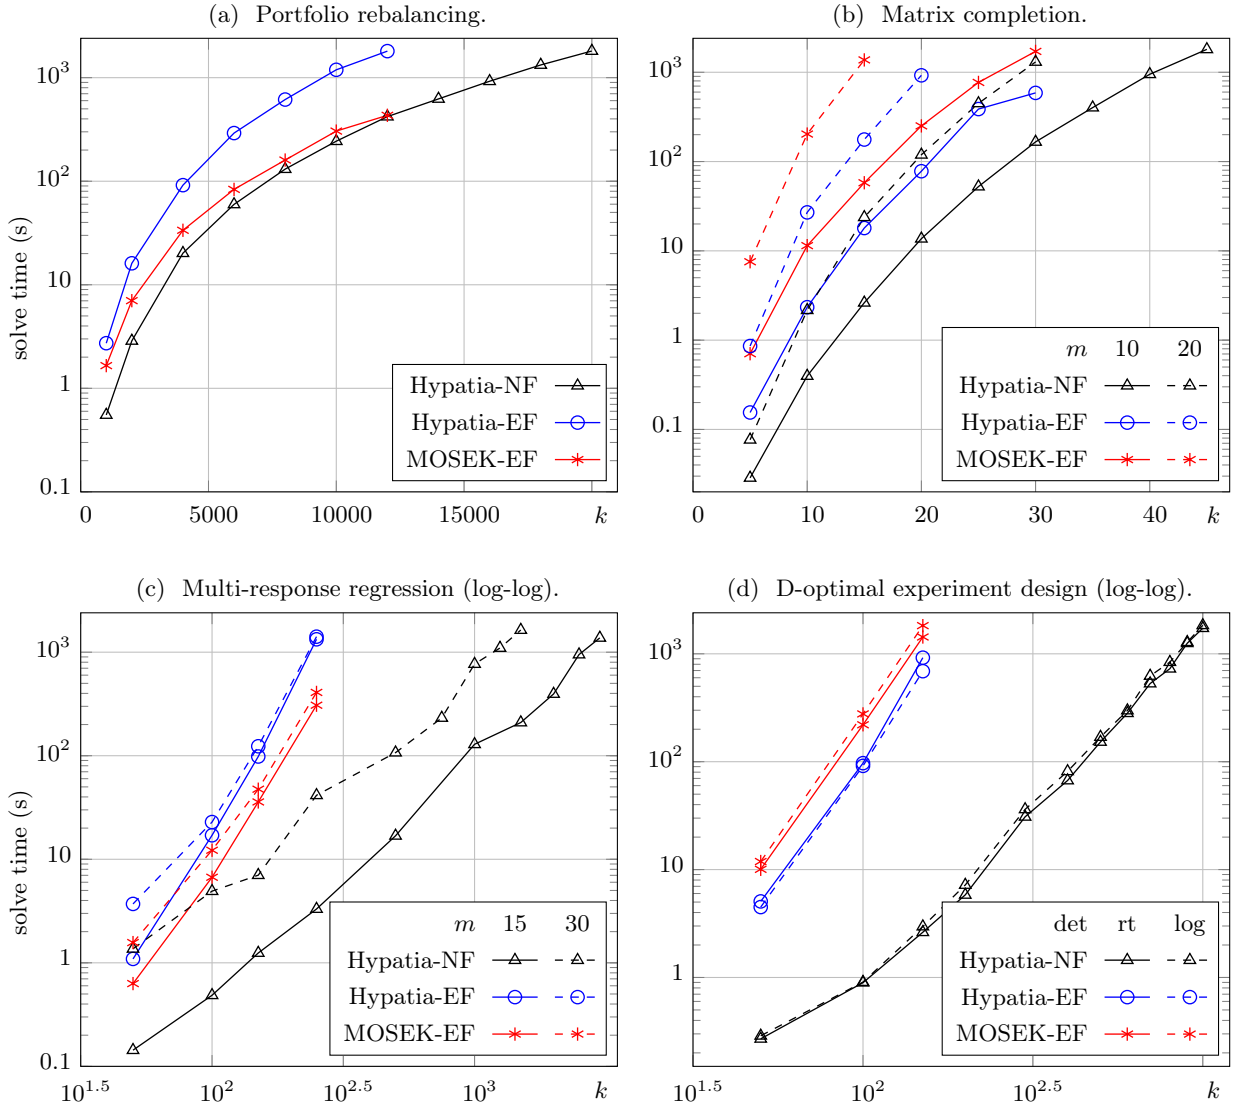

Supplement: ijoc.2022.1202.cd.zip [file natvsext_results.pdf › 2021.0177-main/natvsext_results.pdf]
